# Supplementary material for: Genetic diversity of Entamoeba: Novel ribosomal lineages from cockroaches
Source: PubMed Central journal article supplement (PMC5608334; doi:10.1371/journal.pone.0185233), 2017-09-21
Supplement: pone.0185233.s004.pdf [file pone.0185233.s004.pdf]

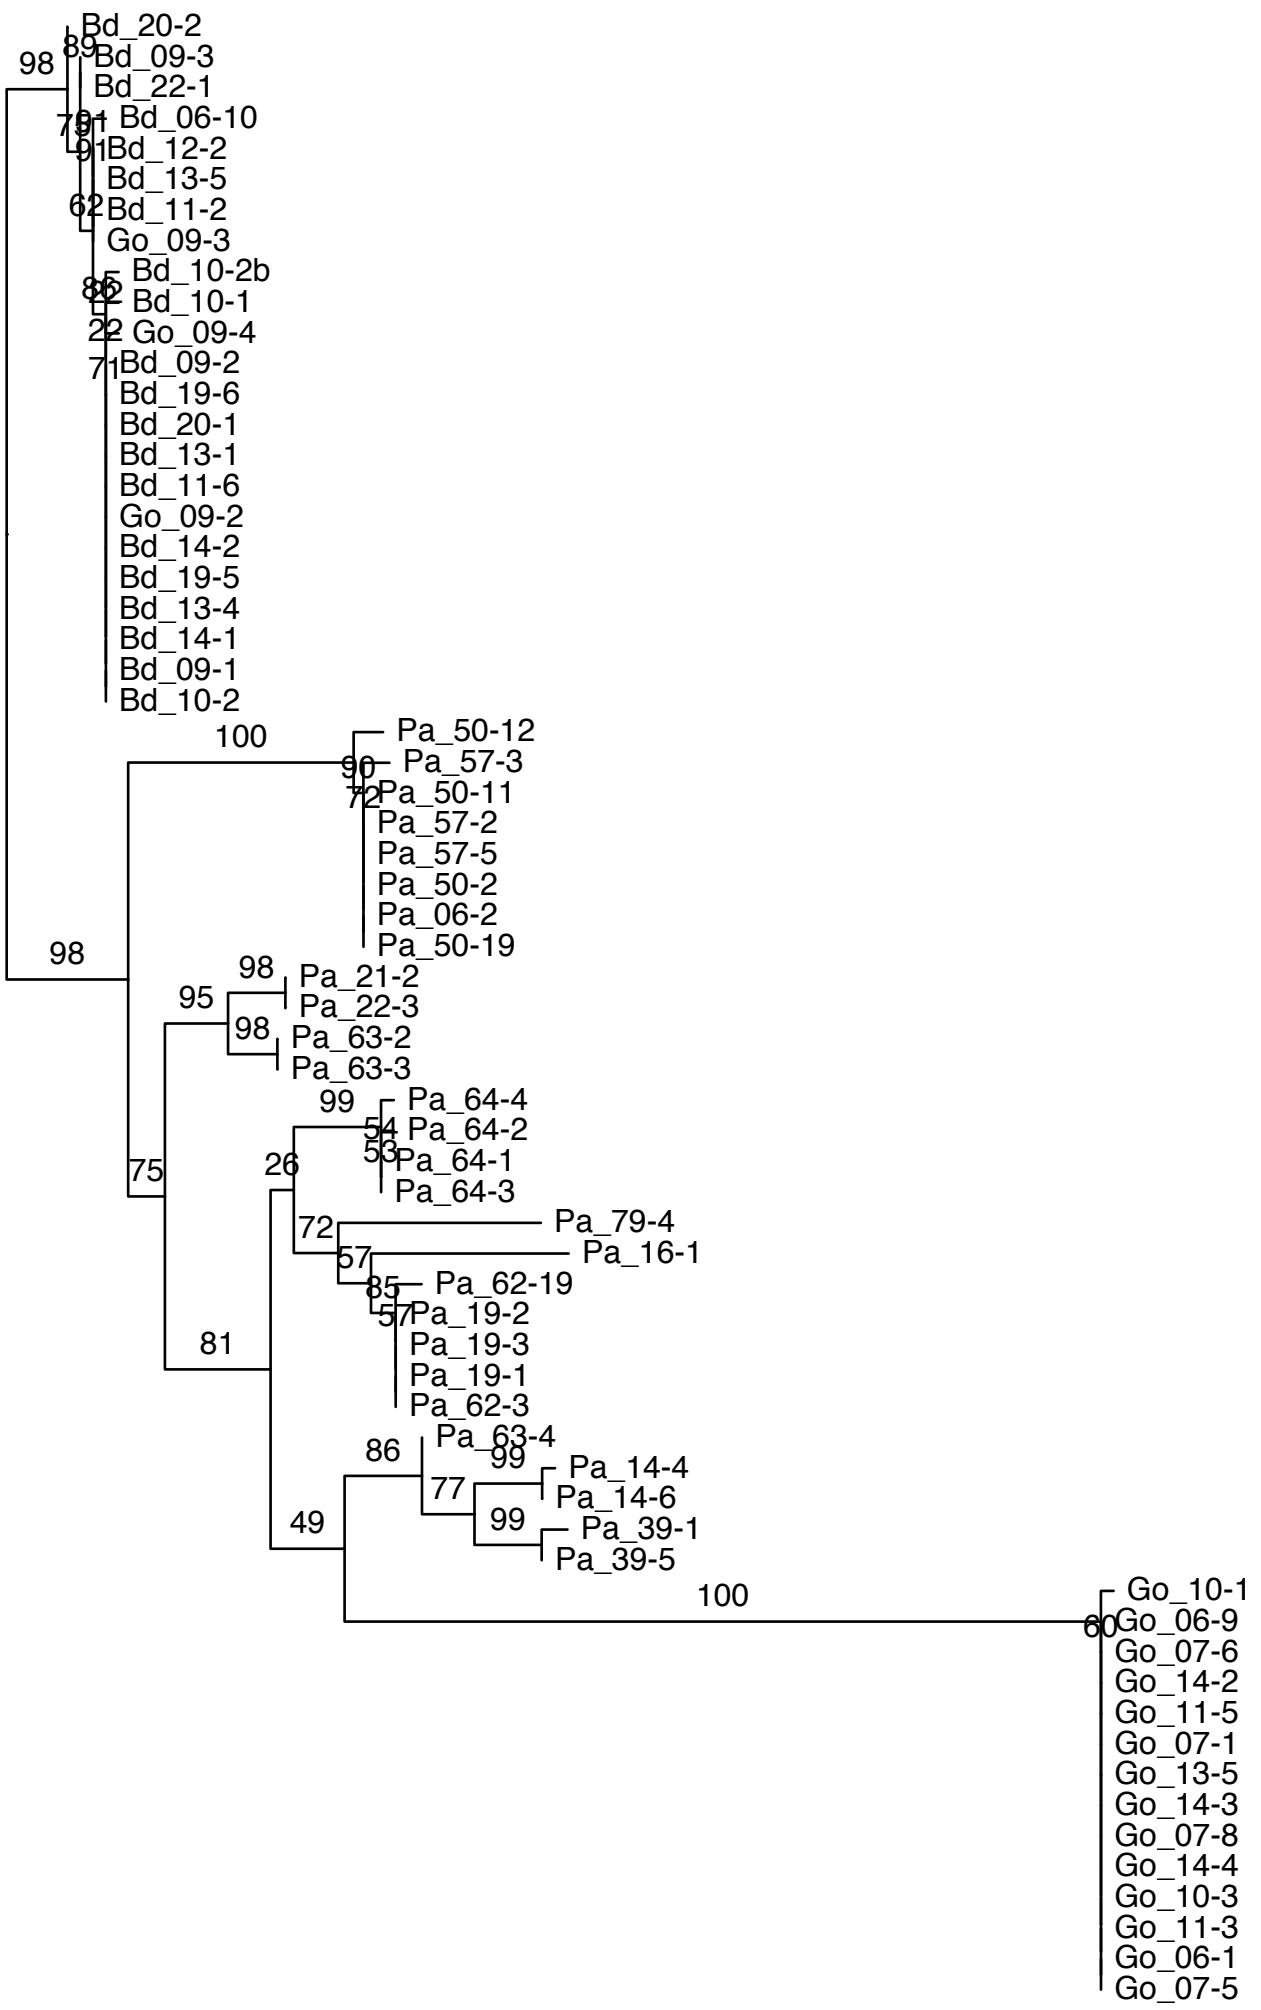

0.0070
