# Supplementary material for: Genetic diversity of Entamoeba: Novel ribosomal lineages from cockroaches
Source: PubMed Central journal article supplement (PMC5608334; doi:10.1371/journal.pone.0185233), 2017-09-21
Supplement: pone.0185233.s006.pdf [file pone.0185233.s006.pdf]

|          |            |             |            |            |            |            |            |
|----------|------------|-------------|------------|------------|------------|------------|------------|
| Bd_06-10 | ATGCAGAGAG | GAGGAGGCCT  | TCACTAGTCC | TAAACACGCT | GCA--CTTTG | CCTCTTCGGA | GGCGGGTGG  |
| Bd_09-1  | ATGCAGAGAG | GAGGAGGCCT  | TCACTAGTCC | TAAACACGCT | GCA--CTTTG | CCTCTTCGGA | GGCGGGTGG  |
| Bd_09-2  | ATGCAGAGAG | GAGGAGGCCT  | TCACTAGTCC | TAAACACGCT | GCA--CTTTG | CCTCTTCGGA | GGCGGGTGG  |
| Bd_09-3  | ACGCAGAGAG | GAGGAGGCCT  | TCACTAGTCC | TAAACACGCT | GCA--CTTTG | CCTCTTCGGA | GGCGGGTGG  |
| Bd_10-1  | ACGCAGAGAG | GAGGAGGCCT  | TCACTAGTCC | TAAACACGCT | GCA--CTTTG | CCTCTTCGGA | GGCGGGTGG  |
| Bd_10-2  | ATGCAGAGAG | GAGGAGGCCT  | TCACTAGTCC | TAAACACGCT | GCA--CTTTG | CCTCTTCGGA | GGCGGGTGG  |
| Bd_10-2b | ATGCAGAGAG | GAGGAGGCCT  | TCACTAGTCC | TAAACACGCT | GCA--CTTTG | CCTCTTCGGA | GGCGGGTGG  |
| Bd_11-2  | ACGCAGAGAG | GAGGAGGCCT  | TCACTAGTCC | TAAACACGCT | GCA--CTTTG | CCTCTTCGGA | GGCGGGTGG  |
| Bd_11-6  | ATGCAGAGAG | GAGGAGGCCT  | TCACTAGTCC | TAAACACGCT | GCA--CTTTG | CCTCTTCGGA | GGCGGGTGG  |
| Bd_12-2  | ACGCAGAGAG | GAGGAGGCCT  | TCACTAGTCC | TAAACACGCT | GCA--CTTTG | CCTCTTCGGA | GGCGGGTGG  |
| Bd_13-1  | ATGCAGAGAG | GAGGAGGCCT  | TCACTAGTCC | TAAACACGCT | GCA--CTTTG | CCTCTTCGGA | GGCGGGTGG  |
| Bd_13-4  | ATGCAGAGAG | GAGGAGGCCT  | TCACTAGTCC | TAAACACGCT | GCA--CTTTG | CCTCTTCGGA | GGCGGGTGG  |
| Bd_13-5  | ATGCAGAGAG | GAGGAGGCCT  | TCACTAGTCC | TAAACACGCT | GCA--CTTTG | CCTCTTCGGA | GGCGGGTGG  |
| Bd_14-1  | ATGCAGAGAG | GAGGAGGCCT  | TCACTAGTCC | TAAACACGCT | GCA--CTTTG | CCTCTTCGGA | GGCGGGTGG  |
| Bd_14-2  | ATGCAGAGAG | GAGGAGGCCT  | TCACTAGTCC | TAAACACGCT | GCA--CTTTG | CCTCTTCGGA | GGCGGGTGG  |
| Bd_19-5  | ATGCAGAGAG | GAGGAGGCCT  | TCACTAGTCC | TAAACACGCT | GCA--CTTTG | CCTCTTCGGA | GGCGGGTGG  |
| Bd_19-6  | ATGCAGAGAG | GAGGAGGCCT  | TCACTAGTCC | TAAACACGCT | GCA--CTTTG | CCTCTTCGGA | GGCGGGTGG  |
| Bd_20-1  | ATGCAGAGAG | GAGGAGGCCT  | TCACTAGTCC | TAAACACGCT | GCA--CTTTG | CCTCTTCGGA | GGCGGGTGG  |
| Bd_20-2  | ACGCAGAGAG | GAGGAGGCCT  | TCACTAGTCC | TAAACACGCT | GCA--CTTTG | CCTCTTCGGA | GGCGGGTGG  |
| Bd_22-1  | ACGCAGAGAG | GAGGAGGCCT  | TCACTAGTCC | TAAACACGCT | GCA--CTTTG | CCTCTTCGGA | GGCGGGTGG  |
| Go_06-1  | AAGCATGTCA | CAGGGCGCCT  | TCAATGGTTC | TAAACACTCA | CTG--CAGCT | CCTCTCCGGA | GGACTGCTGT |
| Go_06-9  | AAGCATGTCA | CAGGGCGCCT  | TCAATGGTTC | TAAACACTCA | CTG--TAGCC | TCTCTCCGGA | GAGCTATCGT |
| Go_07-1  | AAGCATGTCA | CAGGGCGCCT  | TCAATGGTTC | TAAACACTCA | CTG--CAGCT | CCTCTCCGGA | GGACTGCTGT |
| Go_07-5  | AAGCATGTCA | CAGGGCGCCT  | TCAATGGTTC | TAAACACTCA | CTG--CAGCT | CCTCTCCGGA | GGACTGCTGT |
| Go_07-6  | AAGCATGTCA | CAGGGCGCCT  | TCAATGGTTC | TAAACACTCA | CTG--TAGCC | TCTCTCCGGA | GAGCTATCGT |
| Go_07-8  | AAGCATGTCA | CAGGGCGCCT  | TCAATGGTTC | TAAACACTCA | CTG--CAGCT | CCTCTCCGGA | GGACTGCTGT |
| Go_09-2  | ACGCAGAGAG | GAGGAGGCCT  | TCACTAGTCC | TAAACACGCT | GCA--CTTTG | CCTCTTCGGA | GGCGGGTGG  |
| Go_09-3  | ACGCAGAGAG | GAGGAGGCCT  | TCACTAGTCC | TAAACACGCT | GCA--CTTTG | CCTCTTCGGA | GGCGGGTGG  |
| Go_09-4  | ATGCAGAGAG | GAGGAGGCCT  | TCACTAGTCC | TAAACACGCT | GCA--CTTTG | CCTCTTCGGA | GGCGGGTGG  |
| Go_10-1  | AAGCATGTCA | CAGGGCGCCT  | TCAATGGTTC | TAAACACTCA | CTG--CAGCT | CCTCTCCGGA | GGACTGCTGT |
| Go_10-3  | AAGCATGTCA | CAGGGCGCCT  | TCAATGGTTC | TAAACACTCA | CTG--CAGCT | CCTCTCCGGA | GGACTGCTGT |
| Go_11-3  | AAGCATGTCA | CAGGGCGCCT  | TCAATGGTTC | TAAACACTCA | CTG--CAGCT | TCTCTCCGGA | GAGCTGCTGT |
| Go_11-5  | AAGCATGTCA | CAGGGCGCCT  | TCAATGGTTC | TAAACACTCA | CTG--CAGCT | CCTCTCCGGA | GGACTGCTGT |
| Go_13-5  | AAGCATGTCA | CAGGGCGCCT  | TCAATGGTTC | TAAACACTCA | CTG--CAGCT | CCTCTCCGGA | GGACTGCTGT |
| Go_14-2  | AAGCATGTCA | CAGGGCGCCT  | TCAATGGTTC | TAAACACTCA | CTG--CAGCT | CCTCTCCGGA | GGACTGCTGT |
| Go_14-3  | AAGCATGTCA | CAGGGCGCCT  | TCAATGGTTC | TAAACACTCA | CTG--CAGCT | CCTCTCCGGA | GGACTGCTGT |
| Go_14-4  | AAGCATGTCA | CAGGGCGCCT  | TCAATGGTTC | TAAACACTCA | CTG--CAGCT | CCTCTCCGGA | GGACTGCTGT |
| Pa_06-2  | TCCAAAAGAG | AGCGATTCCCT | TCCACAGTCC | TCAACACCTT | TCATGTTGCT | TCTCTCGAGA | GGCTCATGGA |
| Pa_14-4  | ACGCAGTGGT | GGTGGGACCT  | TCCGTAGTCC | TAAACACCTC | AGG--TGCTG | CTCTTCGGAG | CGGTAAGTGG |
| Pa_14-6  | ACGCAGTGGT | GGTGGGACCT  | TCCGTAGTCC | TAAACACCTC | AGG--TGCTG | CTCTTCGGAG | CGGTAAGTGG |
| Pa_16-1  | AAGCAGAGAG | AGCAG--GTCA | GTGATAGTTC | TAAACACCCC | AGA--GCACG | CTCTTCGGAG | TGTGTTTTGG |
| Pa_19-1  | CGGGAGCGAC | AGTG--GTCA  | AGTATAGTTC | TAAACACCTT | CAA--TCACT | CTTTTCGGAG | GGTGGCTGGA |
| Pa_19-2  | CGGGAGCGAC | AGTG--GTCA  | AGTATAGTTC | TAAACACCTT | CAA--TCACT | CTTTTCGGAG | GGTGGCTGGA |
| Pa_19-3  | CGGGAGCGAC | AGTG--GTCA  | AGTATAGTTC | TAAACACCTT | CAA--TCACT | CTTTTCGGAG | GGTGGCTGGA |
| Pa_21-2  | ACGCAGAGGA | GAAGAGGCCT  | TCAATAGTTC | TAAACAAGCT | GCA--CTCTG | CCTCTTCGGA | GACAGGTGAA |
| Pa_22-3  | ACGCAGAGGA | GAAGAGGCCT  | TCAATAGTTC | TAAACAAGCT | GCA--CTCTG | CCTCTTCGGA | GACAGGTGAA |
| Pa_39-1  | TTGCAGTTAC | TGAGGGACCT  | TCCGTAGTTC | TAAACACCTC | ATC--TACTG | CTTTTCGGAG | CAGTAAGTGA |
| Pa_39-5  | TTGCAGTTAC | TGAGGGACCT  | TCCGTAGTTC | TAAACACCTC | ATC--TACTG | CTTTTCGGAG | CAGTAAGTGA |
| Pa_50-11 | TCCAAAAGAG | AGCGATTCCCT | TCCACAGTCC | TCAACACCTT | TCATGTTGCT | TCTCTCGAGA | GGCTCATGGA |
| Pa_50-12 | TCCAAAAGAG | AGCGATTCCCT | TCCACAGTCC | TCAACACCTT | TCATGTTGCT | TCTCTCGAGA | GGCTCATGGA |
| Pa_50-19 | TCCAAAAGAG | AGCGATTCCCT | TCCACAGTCC | TCAACACCTT | TCATGTTGCT | TCTCTCGAGA | GGCTCATGGA |
| Pa_50-2  | TCCAAAAGAG | AGCGATTCCCT | TCCACAGTCC | TCAACACCTT | TCATGTTGCT | TCTCTCGAGA | GGCTCATGGA |
| Pa_57-2  | TCCAAAAGAG | AGCGATTCCCT | TCCACAGTCC | TCAACACCTT | TCATGTTGCT | TCTCTCGAGA | GGCTCATGGA |
| Pa_57-3  | TCCAAAAGAG | AGCGATTCCCT | TCCACAGTCC | TCAACACCTT | TCATGTTGCT | TCTCTCGAGA | GGCTCATGGA |
| Pa_57-5  | TCCAAAAGAG | AGCGATTCCCT | TCCACAGTCC | TCAACACCTT | TCATGTTGCT | TCTCTCGAGA | GGCTCATGGA |
| Pa_62-19 | CGGGAGCGAC | AGTG--GTCA  | AGTATAGTTC | TAAACACCTT | CAG--TCACT | CTTTTCGGAG | GGTGGCTGGA |
| Pa_62-3  | CGGGAGCGAC | AGTG--GTCA  | AGTATAGTTC | TAAACACCTT | CAG--TCACT | CTTTTCGGAG | GGTGGCTGGA |
| Pa_63-2  | ACGCAGAGCG | GAAGAGGCCT  | TCAATAGTTC | TAAAGAAGCT | GCA--CTCTG | CCTCTTCGGA | GACAGGTGAA |
| Pa_63-3  | ACGCAGAGCG | GAAGAGGCCT  | TCAATAGTTC | TAAAGAAGCT | GCA--CTCTG | CCTCTTCGGA | GACAGGTGAA |
| Pa_63-4  | ACGCAGTGCC | TGAGG--ACCT | TCAATAGTTC | TAAACACCTC | TGA--TACTG | CTCTTCGGAG | CCGTTTTCGA |
| Pa_64-1  | TCCGAGAGAT | GCAGC--GTCA | AACACGGTCC | TAAACACCTG | CGC--GCGTT | CTCTTCGGAG | GGCGCACGTG |
| Pa_64-2  | TCCGAGAGAT | GCAGC--GTCA | AACACGGTCC | TAAACACCTG | CGC--GCGTT | CTCTTCGGAG | GGCGCACGTG |
| Pa_64-3  | TCCGAGAGAT | GCAGC--GTCA | AACACGGTCC | TAAACACCTG | CGC--GCGTT | CTCTTCGGAG | GGCGCACGTG |
| Pa_64-4  | TCCGAGAGAT | GCAGC--GTCA | AACACGGTCC | TAAACACCTG | CGC--GCGTT | CTCTTCGGAG | GGCGCACGTG |
| Pa_79-4  | TTGTAGCGAG | TTGAG--AACA | AGTACAGCCC | TAAACACCTT | CAC--ACTGT | CTCTTCGGAG | ATGGTGTGGA |



|          |             |            |            |              |            |             |            |
|----------|-------------|------------|------------|--------------|------------|-------------|------------|
| Bd_06-10 | ATAGAGAGGA  | GATACTTACT | T--ACGCAC  | ---ATGTGTT   | ACG-GTGGTA | TTTCTAGATA  | AGGATTAATA |
| Bd_09-1  | ATAGAGAGGA  | GATACTTACT | T--ACGCAC  | ---ATGTGTT   | ACG-GTGGTA | TTTCTAGATA  | AGGATTAATA |
| Bd_09-2  | ATAGAGAGGA  | GATACTTACT | T--ACGCAC  | ---ATGTGTT   | ACG-GTGGTA | TTTCTAGATA  | AGGATTAATA |
| Bd_09-3  | ATAGAGAGGA  | GATACTTACT | TGCGGCAC   | ---ATGTGTT   | ACG-GTGGTA | TTTCTAGATA  | AGGATTAATA |
| Bd_10-1  | ATAGAGAGGA  | GATACTTACT | TGCGGCAC   | ---ATGTGTT   | ACG-GTGGTA | TTTCTAGATA  | AGGATTAATA |
| Bd_10-2  | ATAGAGAGGA  | GATACTTACT | T--ACGCAC  | ---ATGTGTT   | ACG-GTGGTA | TTTCTAGATA  | AGGATTAATA |
| Bd_10-2b | ATAGAGAGGA  | GATACTTACT | T--ACGCAC  | ---ATGTGTT   | ACA-GTGGTA | TTTCTAGATA  | AGGATTAATA |
| Bd_11-2  | ATAGAGAGGA  | GATACTTACT | T--ACGCAC  | ---ATGTGTT   | ACG-GTGGTA | TTTCTAGATA  | AGGATTAATA |
| Bd_11-6  | ATAGAGAGGA  | GATACTTACT | T--ACGCAC  | ---ATGTGTT   | ACG-GTGGTA | TTTCTAGATA  | AGGATTAATA |
| Bd_12-2  | ATAGAGAGGA  | GATACTTACT | T--ACGCAC  | ---ATGTGTT   | ACG-GTGGTA | TTTCTAGATA  | AGGATTAATA |
| Bd_13-1  | ATAGAGAGGA  | GATACTTACT | T--ACGCAC  | ---ATGTGTT   | ACA-GTGGTA | TTTCTAGATA  | AGGATTAATA |
| Bd_13-4  | ATAGAGAGGA  | GATACTTACT | T--ACGCAC  | ---ATGTGTT   | ACG-GTGGTA | TTTCTAGATA  | AGGATTAATA |
| Bd_13-5  | ATAGAGAGGA  | GATACTTACT | T--ACGCAC  | ---ATGTGAT   | ACG-GTGGTA | TTTCTAGATA  | AGGATTAATA |
| Bd_14-1  | ATAGAGAGGA  | GATACTTACT | T--ACGCAC  | ---ATGTGTT   | ACG-GTGGTA | TTTCTAGATA  | AGGATTAATA |
| Bd_14-2  | ATAGAGAGGA  | GATACTTACT | T--ACGCAC  | ---ATGTGTT   | ACG-GTGGTA | TTTCTAGATA  | AGGATTAATA |
| Bd_19-5  | ATAGAGAGGA  | GATACTTACT | T--ACGCAC  | ---ATGTGAT   | ACG-GTGGTA | TTTCTAGATA  | AGGATTAATA |
| Bd_19-6  | ATAGAGAGGA  | GATACTTACT | T--ACGCAC  | ---ATGTGAT   | ACG-GTGGTA | TTTCTAGATA  | AGGATTAATA |
| Bd_20-1  | ATAGAGAGGA  | GATACTTACT | T--ACGCAC  | ---ATGTGTT   | ACG-GTGGTA | TTTCTAGATA  | AGGATTAATA |
| Bd_20-2  | ATAGAGAGGA  | GATACTTACT | TGCGGCAC   | ---ATGTGTT   | ACG-GTGGTA | TTTCTAGATA  | AGGATTAATA |
| Bd_22-1  | ATAGAGAGGA  | GATACTTACT | T--ACGCAC  | ---ATGTGTT   | ACG-GTGGTA | TTTCTAGATA  | AGGATTAATA |
| Go_06-1  | AAAACGAGGA  | GATTGTTGCC | T--GCGCAC  | ---CTGTGCA   | AGG-GTGCAA | TGTC TAGATA | AGGATTAATA |
| Go_06-9  | AAAACGAGGA  | GATTGTTGCC | T--GCGCAC  | ---CTGTGCA   | AGG-GTGCAA | TGTC TAGATA | AGGATTAATA |
| Go_07-1  | AAAACGAGGA  | GATTGTTGCC | T--GCGCAC  | ---CTGTGCA   | AGG-GCGCAA | TGTC TAGATA | AGGATTAATA |
| Go_07-5  | AAAACGAGGA  | GATTGTTGCC | T--GCGCAC  | ---CTGTGCA   | AGG-GCGCAA | TGTC TAGATA | AGGATTAATA |
| Go_07-6  | AAAACGAGGA  | GATTGTTGCC | T--GCGCAC  | ---CTGTGCA   | AGG-GTGCAA | TGTC TAGATA | AGGATTAATA |
| Go_07-8  | AAAACGAGGA  | GATTGTTGCC | T--GCGCAC  | ---CTGTGCA   | AGG-GTGCAA | TGTC TAGATA | AGGATTAATA |
| Go_09-2  | ATAGAGAGGA  | GATACTTACT | T--ACGCAC  | ---ATGTGTT   | ACG-GTGGTA | TTTCTAGATA  | AGGATTAATA |
| Go_09-3  | ATAGAGAGGA  | GATACTTACT | T--ACGCAC  | ---ATGTGTT   | ACG-GTGGTA | TTTCTAGATA  | AGGATTAATA |
| Go_09-4  | ATAGAGAGGA  | GATACTTACT | T--ACGCAC  | ---ATGTGTT   | ACG-GTGGTA | TTTCTAGATA  | AGGATTAATA |
| Go_10-1  | AAAACGAGGA  | GATTGTTGCC | T--GCGCAC  | ---CTGTGCA   | AGG-GTGCAA | TGTC TAGATA | AGGATTAATA |
| Go_10-3  | AAAACGAGGA  | GATTGTTGCC | T--GCGCAC  | ---CTGTGCA   | AGG-GCGCAA | TGTC TAGATA | AGGATTAATA |
| Go_11-3  | AAAACGAGGA  | GATTGTTGCC | T--GCGCAC  | ---CTGTGCA   | AGG-GCGCAA | TGTC TAGATA | AGGATTAATA |
| Go_11-5  | AAAACGAGGA  | GATTGTTGCC | T--GCGCAC  | ---CTGTGCA   | AGG-GCGCAA | TGTC TAGATA | AGGATTAATA |
| Go_13-5  | AAAACGAGGA  | GATTGTTGCC | T--GCGCAC  | ---CTGTGCA   | AGG-GCGCAA | TGTC TAGATA | AGGATTAATA |
| Go_14-2  | AAAACGAGGA  | GATTGTTGCC | T--GCGCAC  | ---CTGTGCA   | AGG-GCGCAA | TGTC TAGATA | AGGATTAATA |
| Go_14-3  | AAAACGAGGA  | GATTGTTGCC | T--GCGCAC  | ---CTGTGCA   | AGG-GCGCAA | TGTC TAGATA | AGGATTAATA |
| Go_14-4  | AAAACGAGGA  | GATTGTTGCC | T--GCGCAC  | ---CTGTGCA   | AGG-GCGCAA | TGTC TAGATA | AGGATTAATA |
| Pa_06-2  | ATCATGAGGA  | GATACATTC  | A-TTTTCACA | CTTG TGA AAC | ATG-ATTGTA | TTTCTAGATC  | AAGATTAAGA |
| Pa_14-4  | ATAGAGAGGA  | GATGGACATC | C--AAGCAC  | ---ATGTGTG   | AGG-ATACCA | TTTCTAGATA  | AGGATTAATA |
| Pa_14-6  | ATAGAGAGGA  | GATGGACATC | C--AAGCAC  | ---ATGTGTG   | AGG-ATACCA | TTTCTAGATA  | AGGATTAATA |
| Pa_16-1  | ATAGAGAGGA  | GATGCCATTG | C-TGCGCAC  | ---GAGTGCA   | AGG-CAGGCA | TTTCTAGAGA  | AGGATTAATA |
| Pa_19-1  | ATAGAGAGGA  | GATACCCATC | C-CAACCACA | ---TTGTGGG   | TGG-CGGGTA | TTTCTAGATA  | AGGATTAATA |
| Pa_19-2  | ATAGAGAGGA  | GATACCCATC | C-CAACCACA | ---TTGTGGG   | TGG-CGGGTA | TTTCTAGATA  | AGGATTAATA |
| Pa_19-3  | ATAGAGAGGA  | GATACCCATC | C-CAACCACA | ---TTGTGGG   | TGG-CGGGTA | TTTCTAGATA  | AGGATTAATA |
| Pa_21-2  | ATAGAGAGGA  | GATTTCAATC | TGCGTACAGA | ---TTGTACA   | AGG-AAGGAA | TTTCTAATA   | AGGATTAATA |
| Pa_22-3  | ATAGAGAGGA  | GATTTCAATC | TGCGTACAGA | ---TTGTACA   | AGG-AAGGAA | TTTCTAATA   | AGGATTAATA |
| Pa_39-1  | ATAGT GAGGA | GATGATGATC | C--GAGCAC  | ---ATGTGTG   | AGGNAAGTCA | TTTCTAGATA  | AGGATTAATA |
| Pa_39-5  | ATAGT GAGGA | GATGATGATC | C--GAGCAC  | ---ATGTGTG   | AGG-AAGTCA | TTTCTAGATA  | AGGATTAATA |
| Pa_50-11 | ATCCTGAGGA  | GATACATTC  | A-TTTTCACA | CTTG TGA AAC | ATG-ATTGTA | TTTCTAGATC  | AAGATTAAGA |
| Pa_50-12 | ATCATGAGGA  | GATACATTC  | A-TTTTCACA | CTTG TGA AAC | ATG-ATTGTA | TTTCTAGATC  | AAGATTAAGA |
| Pa_50-19 | ATCATGAGGA  | GATACATTC  | A-TTTTCACA | CTTG TGA AAC | ATG-ATTGTA | TTTCTAGATC  | AAGATTAAGA |
| Pa_50-2  | ATCATGAGGA  | GATACATTC  | A-TTTTCACA | CTTG TGA AAC | ATG-ATTGTA | TTTCTAGATC  | AAGATTAAGA |
| Pa_57-2  | ATCATGAGGA  | GATACATTC  | A-TTTTCACA | CTTG TGA ATC | ATG-ATTGTA | TTTCTAGATC  | AAGATTAAGA |
| Pa_57-3  | ATCATGAGGA  | GATACATTC  | A-TTTTCACA | CTTG TGA ATC | ATG-ATTGTA | TTTCTAGATC  | AAGATTAAGA |
| Pa_57-5  | ATCATGAGGA  | GATACATTC  | A-TTTTCACA | CTTG TGA ATC | ATG-ATTGTA | TTTCTAGATC  | AAGATTAAGA |
| Pa_62-19 | ATAGAGAGGA  | GATACCCACA | C-CAACCACA | ---TTGTGAT   | TGG-CGGGTA | TTTCTAGATA  | AGGATTAATA |
| Pa_62-3  | ATAGAGAGGA  | GATACCCACA | C-CAACCACA | ---TTGTGAT   | TGG-CGGGTA | TTTCTAGATA  | AGGATTAATA |
| Pa_63-2  | ATAGAGAGGA  | GATTTCAATC | TGCGTACGAT | ---TTGTACA   | AAG-ATGGAA | TTTCTAATA   | AGGATTAATA |
| Pa_63-3  | ATAGAGAGGA  | GATTTCAATC | TGCGTACGAT | ---TTGTACA   | AAG-ATGGAA | TTTCTAATA   | AGGATTAATA |
| Pa_63-4  | ATAGT GAGGA | GATGACGCTC | C--GAGCAC  | ---TTGTGTG   | AGG-AGGTCA | TTTCTAGATA  | AGGATTAATA |
| Pa_64-1  | ATAGAGAGGA  | GATGCCATTT | C-CAAGCAC  | ---GTGTGTG   | AGG-AGGGCA | TTTCTAGATA  | AGGATTAATA |
| Pa_64-2  | ATAGAGAGGA  | GATGCCATTT | C-CAAGCAC  | ---GTGTGTG   | AGG-AGGGCA | TTTCTAGATA  | AGGATTAATA |
| Pa_64-3  | ATAGAGAGGA  | GATGCCATTT | C-CAAGCAC  | ---GTGTGTG   | AGG-AGGGCA | TTTCTAGATA  | AGGATTAATA |
| Pa_64-4  | ATAGAGAGGA  | GATGCCATTT | C-CAAGCAC  | ---GTGTGTG   | AGG-AGGGCA | TTTCTAGATA  | AGGATTAATA |
| Pa_79-4  | ATAGAGAGGA  | GATGCAGCGA | C--AAACAGT | ---CGATGTG   | CGGAGTTGCA | TTTCTAGATA  | AGGATTAATA |

































|          |            |            |            |            |            |   |
|----------|------------|------------|------------|------------|------------|---|
| Bd_06-10 | AGGAATCTGC | TACGC-AGAG | CCGAATGGAT | CTGAATCTCT | TTATTTAGAG | G |
| Bd_09-1  | AGGAATCTGC | TACGC-AGAG | CCAAATGGAT | CTGAATCTCT | TTATTTAGAG | G |
| Bd_09-2  | AGGAATCTGC | TATGC-AGAG | CCAAATGGAT | CTGAATCTCT | TTATTTAGAG | G |
| Bd_09-3  | AGGAATCTGC | TACGC-AGAG | CCGAATGGAT | CTGAATCTCT | TTATTTAGAG | G |
| Bd_10-1  | AGGAATCTGC | TATGC-AGAG | CCAAATGGAT | CTGAATCTCT | TTATTTAGAG | G |
| Bd_10-2  | AGGAATCTGC | TATGC-AGAG | CCAAATGGAT | CTGAATCTCT | TTATTTAGAG | G |
| Bd_10-2b | AGGAATCTGC | TATGC-AGAG | CCAAATGGAT | CTGAATCTCT | TTATTTAGAG | G |
| Bd_11-2  | AGGAATCTGC | TACGC-AGAG | CCGAATGGAT | CTGAATCTCT | TTATTTAGAG | G |
| Bd_11-6  | AGGAATCTGC | TACGC-AGAG | CCAAATGGAT | CTGAATCTCT | TTATTTAGAG | G |
| Bd_12-2  | AGGAATCTGC | TACGC-AGAG | CCGAATGGAT | CTGAATCTCT | TTATTTAGAG | G |
| Bd_13-1  | AGGAATCTGC | TATGC-AGAG | CCAAATGGAT | CTGAATCTCT | TTATTTAGAG | G |
| Bd_13-4  | AGGAATCTGC | TATGC-AGAG | CCAAATGGAT | CTGAATCTCT | TTATTTAGAG | G |
| Bd_13-5  | AGGAATCTGC | TACGC-AGAG | CCGAATGGAT | CTGAATCTCT | TTATTTAGAG | G |
| Bd_14-1  | AGGAATCTGC | TATGC-AGAG | CCAAATGGAT | CTGAATCTCT | TTATTTAGAG | G |
| Bd_14-2  | AGGAATCTGC | TATGC-AGAG | CCAAATGGAT | CTGAATCTCT | TTATTTAGAG | G |
| Bd_19-5  | AGGAATCTGC | TACGC-AGAG | CCAAATGGAT | CTGAATCTCT | TTATTTAGAG | G |
| Bd_19-6  | AGGAATCTGC | TACGC-AGAG | CCAAATGGAT | CTGAATCTCT | TTATTTAGAG | G |
| Bd_20-1  | AGGAATCTGC | TATGC-AGAG | CCAAATGGAT | CTGAATCTCT | TTATTTAGAG | G |
| Bd_20-2  | AGGAATCTGC | TATGC-AGAG | CCAAATGGAT | CTGAATCTCT | TTATTTAGAG | G |
| Bd_22-1  | AGGAATCTGC | TACGC-AGAG | CCGAATGGAT | CTGAATCTCT | TTATTTAGAG | G |
| Go_06-1  | A-GAGTCGAC | TATGT-CGAA | GCAAATGGAT | CTGAATCTCT | TTATTTAGAG | G |
| Go_06-9  | A-GAGTCGAC | TATGT-CGAA | GCAAATGGAT | CTGAATCTCT | TTATTTAGAG | G |
| Go_07-1  | A-GAGTCGAC | TACGT-CGAA | GCAAATGGAT | CTGAATCTCT | TTATTTAGAG | G |
| Go_07-5  | A-GAGTCGAC | TATGT-CGAA | GCAAATGGAT | CTGAATCTCT | TTATTTAGAG | G |
| Go_07-6  | A-GAGTCGAC | TATGT-CGAA | GCAAATGGAT | CTGAATCTCT | TTATTTAGAG | G |
| Go_07-8  | A-GAGTCGAC | TATGT-CGAA | GCAAATGGAT | CTGAATCTCT | TTATTTAGAG | G |
| Go_09-2  | AGGAATCTGC | TACGC-AGAG | CCAAATGGAT | CTGAATCTCT | TTATTTAGAG | G |
| Go_09-3  | AGGAATCTGC | TACGC-AGAG | CCGAATGGAT | CTGAATCTCT | TTATTTAGAG | G |
| Go_09-4  | AGGAATCTGC | TATGC-AGAG | CCAAATGGAT | CTGAATCTCT | TTATTTAGAG | G |
| Go_10-1  | A-GAGTCGAC | TATGT-CGAA | GCAAATGGAT | CTGAATCTCT | TTATTTAGAG | G |
| Go_10-3  | A-GAGTCGAC | TATGT-CGAA | GCAAATGGAT | CTGAATCTCT | TTATTTAGAG | G |
| Go_11-3  | A-GAGTCGAC | TACGT-CGAA | GCAAATGGAT | CTGAATCTCT | TTATTTAGAG | G |
| Go_11-5  | A-GAGTCGAC | TATGT-CGAA | GCAAATGGAT | CTGAATCTCT | TTATTTAGAG | G |
| Go_13-5  | A-GAGTCGAC | TATGT-CGAA | GCAAATGGAT | CTGAATCTCT | TTATTTAGAG | G |
| Go_14-2  | A-GAGTCGAC | TACGT-CGAA | GCAAATGGAT | CTGAATCTCT | TTATTTAGAG | G |
| Go_14-3  | A-GAGTCGAC | TATGT-CGAA | GCAAATGGAT | CTGAATCTCT | TTATTTAGAG | G |
| Go_14-4  | A-GAGTCGAC | TACGT-CGAA | GCAAATGGAT | CTGAATCTCT | TTATTTAGAG | G |
| Pa_06-2  | AGGAATCCAT | TCATT-GGAA | CCAAATGGAT | CTGAATCTCT | TTATTTAGAG | G |
| Pa_14-4  | AGGAATCAGT | TCTGC-TGAG | CCGAATGGAT | CTGAATCTCT | TTATTTAGAG | G |
| Pa_14-6  | AGGAATCAGT | TCTGC-TGAG | CCGAATGGAT | CTGAATCTCT | TTATTTAGAG | G |
| Pa_16-1  | AGGAATCACT | TCCAG-TGAG | CCGAATGGAT | CTGAATCTCT | TTATTTAGAG | G |
| Pa_19-1  | AGGAATCATC | TTTGGATGAG | CCGAATGGAT | CTGAATCTCT | TTATTTAGAG | G |
| Pa_19-2  | AGGAATCATC | TTTGGATGAG | CCGAATGGAT | CTGAATCTCT | TTATTTAGAG | G |
| Pa_19-3  | AGGAATCATC | TTTGGATGAG | CCGAATGGAT | CTGAATCTCT | TTATTTAGAG | G |
| Pa_21-2  | AGGAATCTAC | AACGT-AGAA | CCAAATGGAT | CTGAATCTCT | TTATTTAGAG | G |
| Pa_22-3  | AGGAATCTAC | AACGT-AGAA | CCAAATGGAT | CTGAATCTCT | TTATTTAGAG | G |
| Pa_39-1  | AGGAATCACA | ATTAG-TGAG | CCGAATGGAT | CTGAATCTCT | TTATTTAGAG | G |
| Pa_39-5  | AGGAATCACA | ATTAG-TGAG | CCGAATGGAT | CTGAATCTCT | TTATTTAGAG | G |
| Pa_50-11 | AGGAATCCAT | TCATT-GGAA | CCAAATGGAT | CTGAATCTCT | TTATTTAGAG | G |
| Pa_50-12 | AGGAATCCAT | TCATT-GGAA | CCAAATGGAT | CTGAATCTCT | TTATTTAGAG | G |
| Pa_50-19 | AGGAATCCAT | TCATT-GGAA | CCAAATGGAT | CTGAATCTCT | TTATTTAGAG | G |
| Pa_50-2  | AGGAATCCAT | TCATT-GGAA | CCAAATGGAT | CTGAATCTCT | TTATTTAGAG | G |
| Pa_57-2  | AGGAATCCAT | TCATT-GGAA | CCAAATGGAT | CTGAATCTCT | TTATTTAGAG | G |
| Pa_57-3  | AGGAATCCAT | TCATT-GGAA | CCAAATGGAT | CTGAATCTCT | TTATTTAGAG | G |
| Pa_57-5  | AGGAATCCAT | TCATT-GGAA | CCAAATGGAT | CTGAATCTCT | TTATTTAGAG | G |
| Pa_62-19 | AGGAATCATC | ACACGATGAG | CCGAATGGAT | CTGAATCTCT | TTATTTAGAG | G |
| Pa_62-3  | AGGAATCATC | ACACGATGAG | CCGAATGGAT | CTGAATCTCT | TTATTTAGAG | G |
| Pa_63-2  | AGGAATCTGC | TATGC-AGAA | CCAAATGGAT | CTGAATCTCT | TTATTTAGAG | G |
| Pa_63-3  | AGGAATCTGC | TATGC-AGAA | CCAAATGGAT | CTGAATCTCT | TTATTTAGAG | G |
| Pa_63-4  | AGGAATCAGC | ACTAGTTGAA | CCGAATGGAT | CTGAATCTCT | TTATTTAGAG | G |
| Pa_64-1  | AGGAATCACC | TCTGG-TGAG | CCGAATGGAT | CTGAATCTCT | TTATTTAGAG | G |
| Pa_64-2  | AGGAATCACC | TCTGG-TGAG | CCGAATGGAT | CTGAATCTCT | TTATTTAGAG | G |
| Pa_64-3  | AGGAATCACC | TCTGG-TGAG | CCGAATGGAT | CTGAATCTCT | TTATTTAGAG | G |
| Pa_64-4  | AGGAATCACC | TCTGG-TGAG | CCGAATGGAT | CTGAATCTCT | TTATTTAGAG | G |
| Pa_79-4  | AGGAATCATC | GTTGA-TGAG | CCGAATGGAT | CTGAATCTCT | TTATTTAGAG | G |
